# Supplementary material
Source: Springer Nature journal article supplement (https://www.springermedizin.de/resource/supplementary/12889_2010_2077_MOESM2_ESM.pdf/9484514)
Supplement: MOESM2 [file 9484514]

Asked to participate  
N = 13.005  
t<sub>1</sub>

Participated in 1st  
round  
N = 5.561\* (43%)

Deceased  
between t<sub>1</sub> & t<sub>2</sub>  
N = 258 (5%)

Participated in  
2nd round (t<sub>2</sub>)  
N = 4.665 (88%)

|                                                                                                                                              |                                               |                                                       |
|----------------------------------------------------------------------------------------------------------------------------------------------|-----------------------------------------------|-------------------------------------------------------|
| Did not participate<br>N = 7.444 (57%), from which:                                                                                          |                                               |                                                       |
| Non-response<br>with reason<br>N = 1770<br>-Too confronting<br>(32%)<br>- No time/interst<br>(26%)<br>- Bad health<br>(17%)<br>- Other (25%) | Non-response<br>unknown<br>reason<br>N = 5280 | Deceased<br>before<br>able to<br>reply<br><br>N = 394 |

|                                                                            |                                  |
|----------------------------------------------------------------------------|----------------------------------|
| Did not participate in 2 <sup>nd</sup> round<br>N = 638 (12%), from which: |                                  |
| Moved,<br>end mem-<br>bership NVVE<br>or other<br>reason<br>N = 165        | Unknown<br>reason<br><br>N = 473 |
